# Supplementary material for: GRASP65 controls the cis Golgi integrity in vivo
Source: PubMed Central journal article supplement (PMC4058077; doi:10.1242/bio.20147757), 2014-05-02
Supplement: supp_bio.20147757_bio.20147757-s1.pdf [file supp_bio.20147757_bio.20147757-s1.pdf]

**Supplementary Material**

Tineke Veenendaal et al. doi: 10.1242/bio.20147757

**Fig. S1. Information related to Fig. 1A.** (A) Position and symbol of key element in the targeting vector. (B) Full sequence of the annotated targeted GRASP65 gene. See supplementary material web page for this figure.

**Fig. S2. Matching GRASP65 exons 1–3 to protein sequence.** (A) *GRASP65* genomic region around exons 1–3 matching DNA sequence to protein sequence. (B) Exons 1–3 encodes GRASP65 PDZ1 (according to Truschel et al., 2011).

**A****mus musculus GRASP65 genomic sequence (till exon 3)****5' UTR**

1 cccacgtgactaggccacgcagcagcgggagagggcgcc

**Exon 1**

42 atggggctaggggcaagcagcagcagccggcgggcgaggccttccatctgcacggggtg

&gt;&gt;1 MGLGASSEQPAGGEGFHLHGV

Intron 1: 104–4219

**Exon 2**4220 caagagaactcgccggccagcagcagcagcctggagccctacttcgacttcatcatcaccatcgggc  
actcgaggctggtg

&gt;&gt;2 QENSPAQQAGLEPYDFIITIGHSRL

Intron 2: 4301–4734

**Exon 3**4735 aacaaggagaacgacacgctgaaggcattgctgaaggccaatgtggagaagccggtgaagctggag  
gtattcaacatgaagaccatgaaggtgcgcgaggtagaggtggtgccagcaacatgtggggcgccagg  
gcctcctgggagccagcgtgcgcttctgtagcttccgcagggccagcgaacacgtgtggcatgtgctg

&gt;&gt;48 NKENDTLKALLKANVEKPKLEVFNMKTMKVREVEVVPSNMWGGQLLGASVRFCSFRRASEHVHVL

**B**

**GRASP65 PDZ1 expression after KI of *GRASP65*[*LacZ*].** The ligand-binding domain formed by the second  $\alpha$ -helix (shown in blue) and second  $\beta$ -strand (shown in red) is still present (according to Truschel et al, 2011)

1

MGLGASSEQPAGGEGFHLHGVQENSPAQQAGLEPYDFIITIGHSRLNKENDTLKALLKANVEKPKLEVFNMK

beta3                      alpha1                      beta4                      alpha2                      beta6

115

TMKVREVEVVPSNMWGGQLLGASVRFCSFRRASEHVHVL

beta1                      beta2

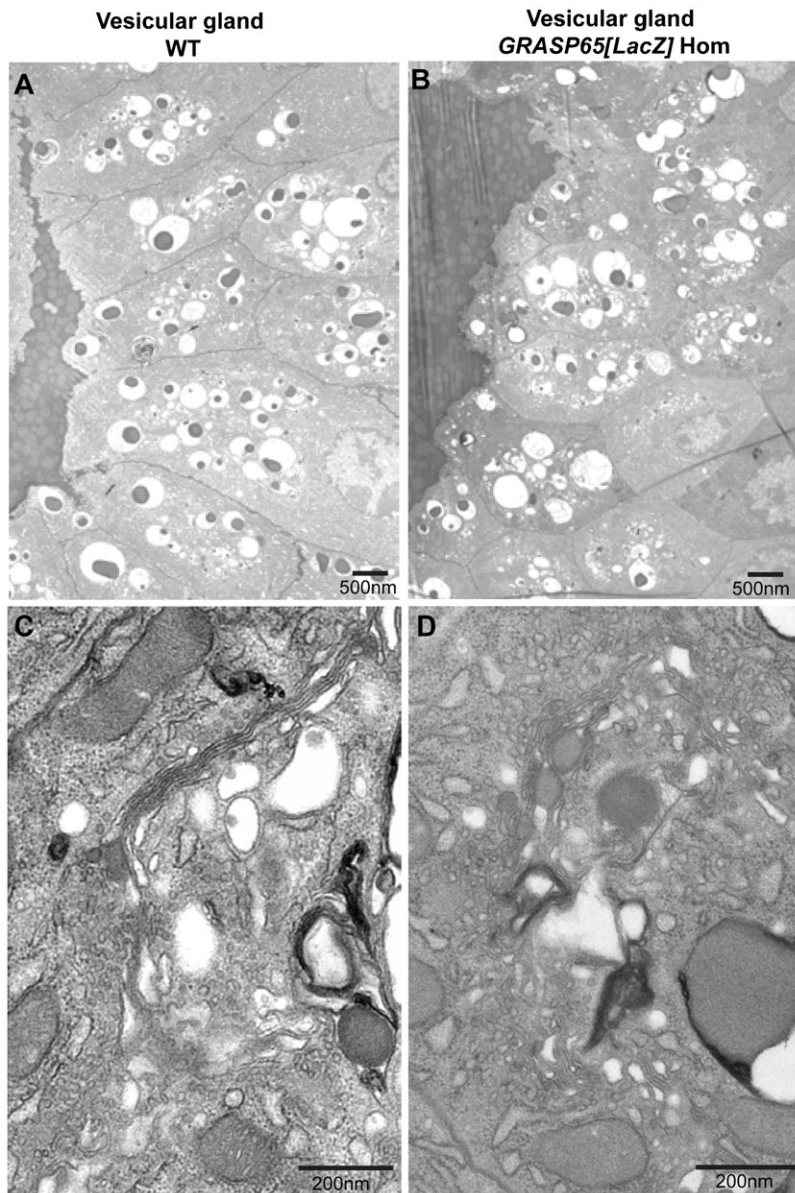

**Fig. S3. The Golgi apparatus appears normal in KO vesicular glands.** (A,B) Low magnification of vesicular glands ultrathin epon sections from WT (A) and *GRASP65[LacZ]* hom (B) mice. (C,D) Golgi profiles in ultrathin epon sections of vesicular glands from WT (A), het (C) and *GRASP65[LacZ]* hom (D,F) mice. Note that no differences are detectable. Scale bars: 500 nm (A,B), 200 nm (C,D).

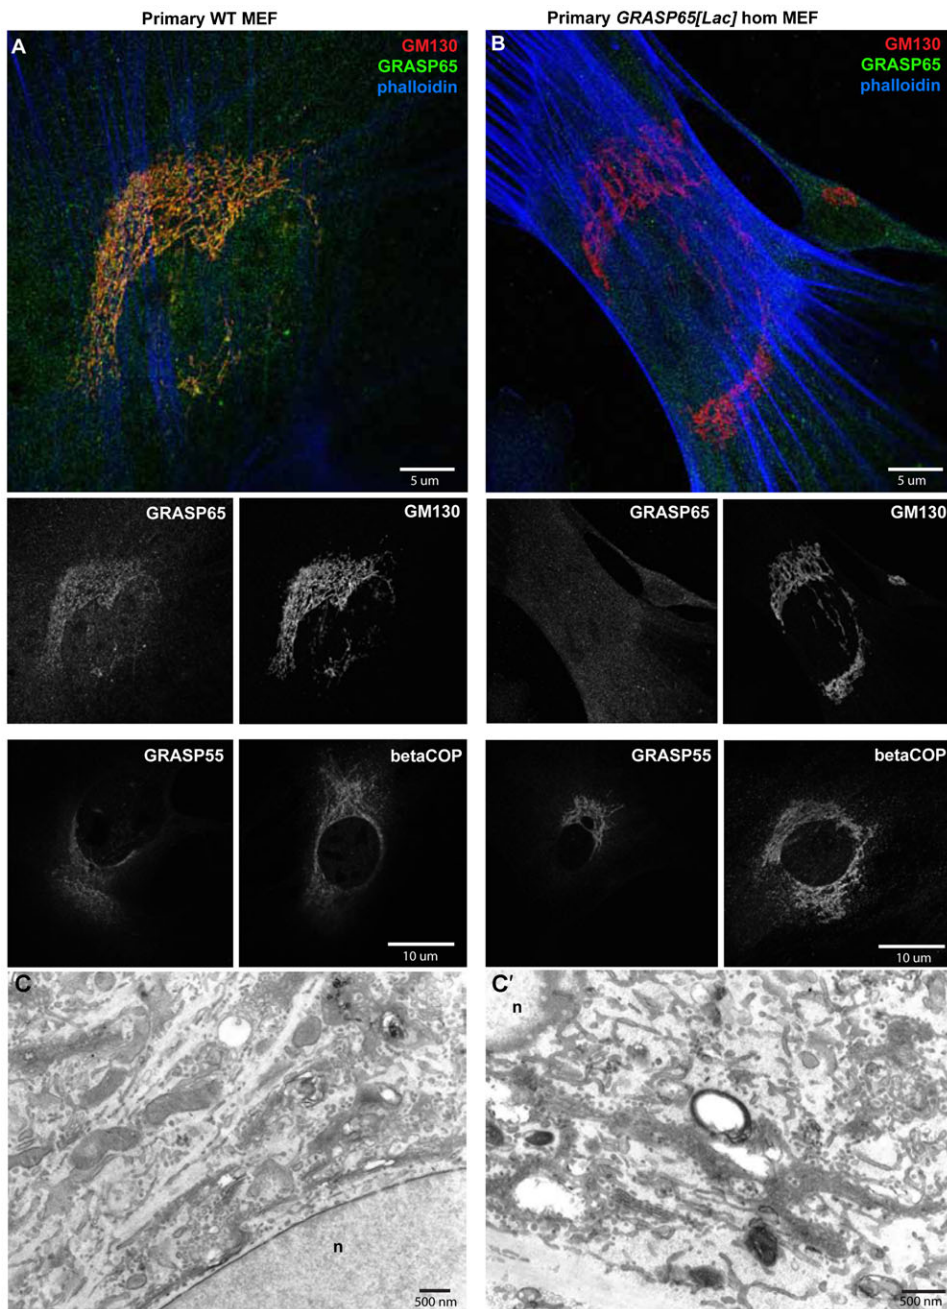

**Fig. S4. Characterisation of the primary MEFs.** (A,B) Immunofluorescence visualisation of GRASP65, GRASP55, GM130 and betaCOP in primary WT (A) and *GRASP65[LacZ]* homozygous (B) MEFs. (C,C') High magnification view of Golgi profiles in ultrathin epon sections of primary WT (A) and *GRASP65[LacZ]* Hom MEFs (A'). Note that no differences are detectable. Scale bars: 5 μm (A,B), 10 μm (middle panels), 500 nm (C,C').

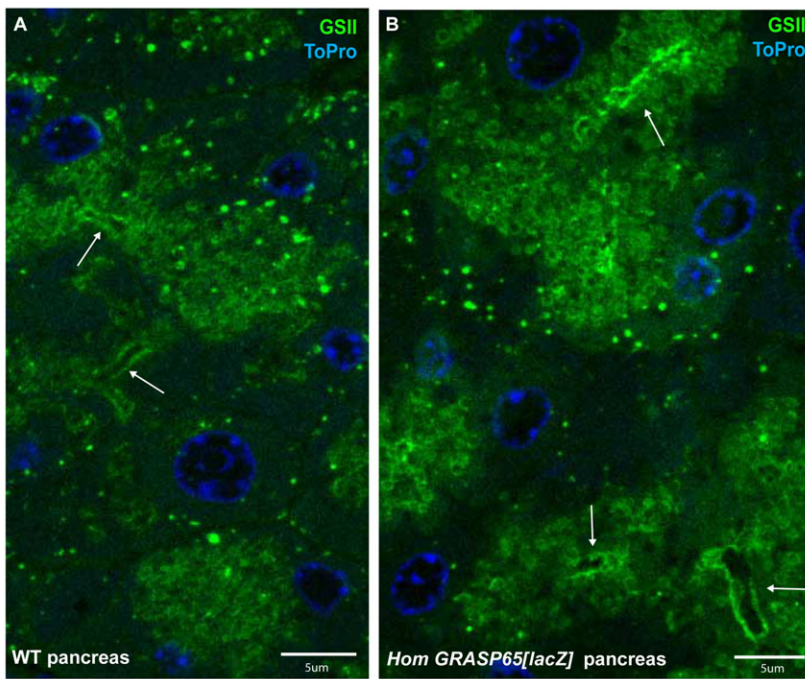

**Fig. S5. GSII lectin staining of exocrine pancreas.** GSII (green) and ToPro (blue, nucleus) staining of thin frozen section of fixed wild-type (A) and GRASP65[LacZ] (B) exocrine pancreas. Note that the ducts (apical plasma membrane) marked by arrows are stained in both. Scale bars: 5 μm.
